# Supplementary material
Source: MDPI journal article supplement (https://www.mdpi.com/1660-4601/12/6/6352)

## Sampling Sites

This section lists all the inserted sampling sites.

The values for the attributes of a sampling can be personalized using the contextual menu.

land use mappingwater usewater typegeoalt. typecatchment areadepthsize typegeology

# Sampling sites

New sampling\_site

View one sampling site

Edit one sampling site

List of sampling sites: you can filter (using the lens icon in the bottom of the grid), sort (clicking on the header column), scroll the data in the grid (using the pagination system)

|   | Code       | Name                       | Water use        | Water type    | Land         | Geo pos.                   | edit |
|---|------------|----------------------------|------------------|---------------|--------------|----------------------------|------|
| i | CANET      | Canet Saint Nazaire lagoon | Recreative water | Surface water | Grazing land | Canet Saint Nazaire lagoon |      |
| i | SOLA       | SOLA station               | Recreative water | Surface water | Grazing land | SOLA station (France)      |      |
| i | SCHWENTINE | Schwentine                 | Recreative water | Surface water | Grazing land | Schwentine (Germany)       |      |
| i | MONDONY    | Mondony river              | Recreative water | Surface water | Grazing land | Mondony river (France)     |      |
| i | SAPANCA    | Lake of Sapanca            | Recreative water | Surface water | Grazing land | Lake of Sapanca (Turkey)   |      |
| i | POTENZA    | River Potenza              | Recreative water | Surface water | Grazing land | River Potenza (Italy)      |      |
| i | FIASTRA    | Lake of Fiastra            | Recreative water | Surface water | Grazing land | Lake of Fiastra (Italy)    |      |
| i | CHIENTI    | River Chienti              | Recreative water | Surface water | Grazing land | River Chienti (Italy)      |      |
| i | AMELIE     | AMELIE                     | Recreative water | Surface water | Grazing land | AMELIE (France)            |      |

Page 1 of 110

View 1 - 9 of 9

New sampling\_site

PlanSatelliteMixte

To create a new sampling site click on the link ["New sampling site"](#)

# New sampling site

[Back](#)

Create

## GENERAL DATA

Code

Name

Select Water Type

S - Surface water ▼

Select Water Use

R Recreative water ▼

Select Land use mapping

Grazing land ▼

Select Geographical place

Canet Saint Nazaire lagoon (France) ▼

Link

## ENVIRONMENTAL DATA

Select altitude type (m)

undefined ▼

Select the catchment area (km²)

undefined ▼

Select the geology

undefined ▼

Select the depth (m)

undefined ▼

Select the size tipology (km²)

undefined ▼

Distance to source (km)

0.0

Note

Clicking on one link in the contextual menu of a main scope (Samplings, Oligo and MicroArray) brings to the relative resource (e.g. water use or water type).

Usually the resource appears like a drop-down box where you can select a choice.

The list of available values for the resource can be extended using the dedicated page.

All resources have these pages:

1. Page for listing the elements
2. Page to create a new element
3. Page to modify an existing element.

For example the geographical position ("geo") resource.

[land use mapping](#) [water use](#) [water type](#) [geo](#) [alt. type](#) [catchment area](#) [depth](#) [size type](#) [geology](#) [country](#)

## Geographical positions

[New geo](#)

| Name                       | Lon       | Lat       | Country    |                      |                      |                        |
|----------------------------|-----------|-----------|------------|----------------------|----------------------|------------------------|
| Canet Saint Nazaire lagoon | 3.029523  | 42.659567 | FR France  | <a href="#">Show</a> | <a href="#">Edit</a> | <a href="#">Delete</a> |
| SOLA station               | 3.029523  | 42.659567 | FR France  | <a href="#">Show</a> | <a href="#">Edit</a> | <a href="#">Delete</a> |
| Schwentine                 | 10.18611  | 54.3275   | DE Germany | <a href="#">Show</a> | <a href="#">Edit</a> | <a href="#">Delete</a> |
| Mondony river              | 2.669206  | 42.472034 | FR France  | <a href="#">Show</a> | <a href="#">Edit</a> | <a href="#">Delete</a> |
| Lake of Sapanca            | 30.25     | 40.716667 | TR Turkey  | <a href="#">Show</a> | <a href="#">Edit</a> | <a href="#">Delete</a> |
| River Potenza              | 12.92254  | 43.130174 | IT Italy   | <a href="#">Show</a> | <a href="#">Edit</a> | <a href="#">Delete</a> |
| Lake of Fiastra            | 13.1562   | 43.0359   | IT Italy   | <a href="#">Show</a> | <a href="#">Edit</a> | <a href="#">Delete</a> |
| River Chienti              | 13.033333 | 42.95     | IT Italy   | <a href="#">Show</a> | <a href="#">Edit</a> | <a href="#">Delete</a> |
| AMELIE                     | 3.029523  | 42.659567 | FR France  | <a href="#">Show</a> | <a href="#">Edit</a> | <a href="#">Delete</a> |



Supplement: s1 [file s1]
