# Supplementary material
Source: MDPI journal article supplement (https://www.mdpi.com/1660-4601/12/6/6352)
Supplement: s1 [file s1]

## General Information about the MicroAqua internal website

### Login

Reach the Login page by clicking “Internal Site” and sign in with your credentials

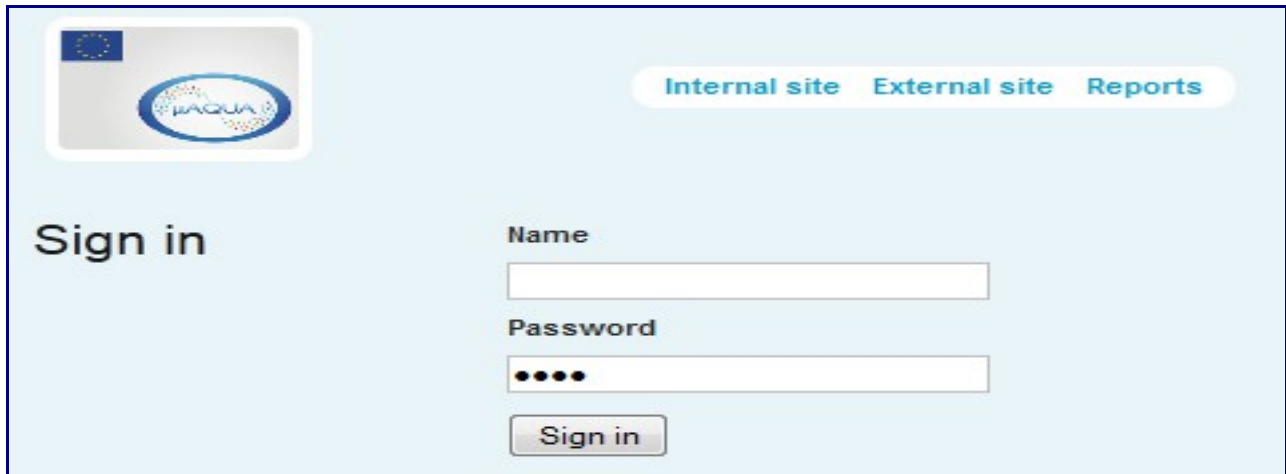

The screenshot shows the login interface of the MicroAqua internal website. At the top left is the MicroAqua logo, which includes the European Union flag and the text 'MicroAqua'. To the right of the logo are three tabs: 'Internal site', 'External site', and 'Reports'. Below the logo, the text 'Sign in' is displayed. To the right of 'Sign in' are two input fields: 'Name' and 'Password'. The 'Password' field is masked with four dots. Below the 'Password' field is a 'Sign in' button.

### Internal site

The site covers three major areas:

*Samples*

*Filter Samples*

*Extracted Nucleic acids(RNA/DNA)*

*Oligo sequences*

*Microarray*

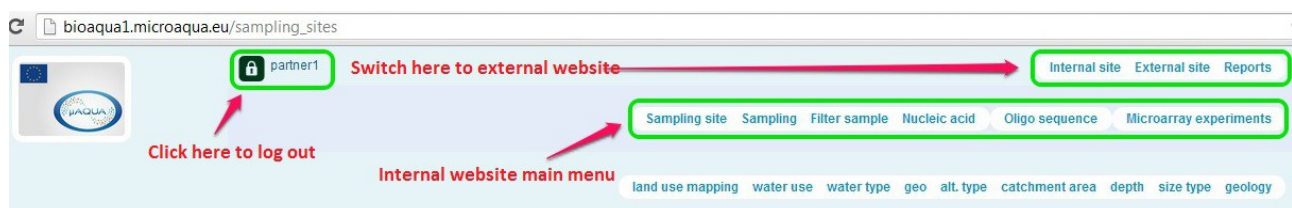

Once logged it appears the main menu. In the top right you can reach the External web site or the Reports site.

## Architecture

The Internal Site is separated from the External Site. They are developed with different technologies as their scope is different.

External site (Web content) is powered by Drupal (CMS).

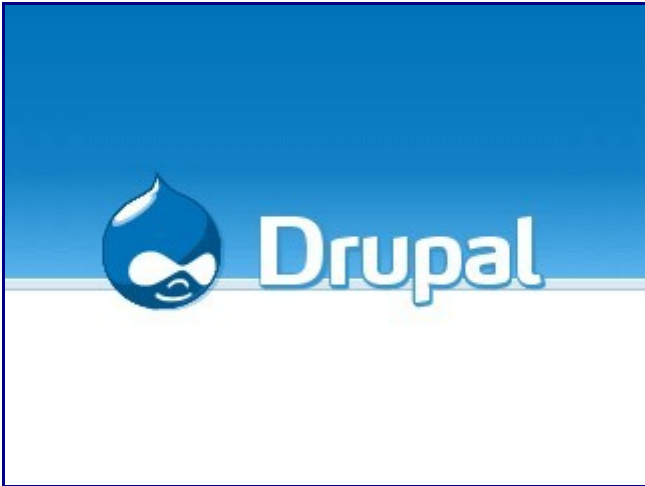

Internal site (Database) is developed under Ruby on Rails (MVC).

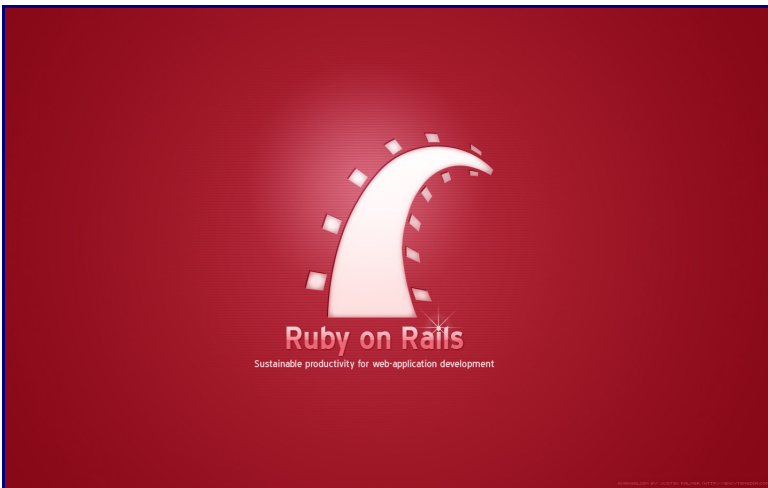

For this reason the authentication systems are separated. The default password is the same in both systems, but you are free to change the passwords and keep them synchronized.
