# Supplementary material
Source: MDPI journal article supplement (https://www.mdpi.com/1660-4601/12/6/6352)
Supplement: s1 [file s1]

## Microarray Experiments

Microarray GAL  
Microarray GPR  
Microarray Images

The current implementation of data management support in the MicroAqua website includes .gal, .gpr & image file upload and parsing of file associated data to populate the current MicroAQUA database for better visualization, handling and further analysis of Microarray data.

Following are the steps to operate the utility on MicroAqua internal website (<http://bioaqua1.microaqua.eu/signin>):

**Prerequisite:** before proceeding to create a *Microarray Experiment* record, it is required to save all oligos, utilized in the microarray experiment, in MicroAqua database. It can be done manually (from *Oligo Sequence* section) or by utilizing "*Batch file upload*" functionality (refer to the help guide).

All Microarray associated modules come under "*Microarray Experiment*" section, consisting of sections: Microarray GAL, Microarray GPR, Microarray Image, Microarray Analysis and Microarray Validations.

The Microarray Experiment section displays records of individual experiments performed on samples (from Filter Sample table) utilizing oligos (from Oligo Sequence table). One microarray experiment uses one .gal file, providing information about spots positioning on array chip, and produces image files and one result file, the .gpr file.

The microaqua internal website, backed by a database, supports the management of the data files (both .gal and .gpr) and images produced from the scanner.

This document will explain how to handle the data files using MicroAqua internal website.

1. Microarray Experiment section displays records showing unique experiment ID, unique GAL and GPR code, partner code, date of microarray experiment and scanner image associated with the particular experiment.

Microarray experiments

New microarray experiment

List of Microarray experiments: you can filter (using the lens icon in the bottom of the grid), sort (clicking on the header column), scroll the data in the grid (using the pagination system)

| Microarray exp. code | Filter sample | GAL code | Partner | GPR code | Exp. date | Image | Edit |
|----------------------|---------------|----------|---------|----------|-----------|-------|------|
|                      |               |          |         |          |           |       |      |

Unique microarray experiment code assigned to individual microarray experiment

Filter sample code displaying sample utilized in microarray experiment

Unique GAL code assigned to individual uploaded .gal file

Partner code

Unique GPR code assigned to individual uploaded .gpr file

Microarray experiment date

Image associated with individual microarray experiment

Edit Microarray experiment

2. To create a microarray experiment record, the related GAL file must first be uploaded. Everytime a new file is uploaded, the resulting page will ask user to upload the other related files. Once the files are uploaded and automatically parsed in the database, the entries are available and must be associated with each other in the "New Microarray Experiment" page.

The screenshot shows the 'Microarray experiments' page. At the top, there is a navigation bar with links: 'Internal site', 'External site', and 'Reports'. Below this is a sub-navigation bar with links: 'Sampling site', 'Sampling', 'Filter sample', 'Nucleic acid', 'Oligo sequence', and 'Microarray experiments'. A red banner message states: 'No microarraygal found! create first someone...'. Below the banner, there is a green checkmark icon and a message: 'New microarray experiment cannot be created without uploading .gal, .gpr & microarray images. User has to proceed from Microarray .GAL subtable'. A red arrow points to the 'New microarray experiment' link, with a red 'X' over it and a message: 'Dont click on "New microarray experiment" first to create a new microarray experment record.'.

**Microarray experiments**

New microarray experiment

List of Microarray experiments: you can filter (using the lens icon in the bottom of the grid), sort (clicking on the header column), scroll the data in the grid (using the pagination system)

| Microarray exp. code | Filter sample | GAL code | Partner | GPR code | Exp. date | Image | Edit |
|----------------------|---------------|----------|---------|----------|-----------|-------|------|
|----------------------|---------------|----------|---------|----------|-----------|-------|------|

3. Click on the "New microarraygal" link.

The screenshot shows the 'Microarray Spots Information (.GAL)' page. At the top, there is a navigation bar with links: 'Internal site', 'External site', and 'Reports'. Below this is a sub-navigation bar with links: 'Sampling site', 'Sampling', 'Filter sample', 'Nucleic acid', 'Oligo sequence', and 'Microarray experiments'. Below the sub-navigation bar, there is a message: '\*\*Tables with in Microarray .GAL module' with a red arrow pointing to a sub-navigation bar with links: 'GAL file header', 'GAL block information', and 'GAL oligo information'. Below this, there is a green box with the text 'New microarraygal' and a red arrow pointing to it with the text 'Upload new microarray .gal file'.

**Microarray Spots Information (.GAL)**

New microarraygal

List of .gal files: you can filter (using the lens icon in the bottom of the grid), sort (clicking on the header column), scroll the data in the grid (using the pagination system)

| GAL code | Partner | GAL title | Barcode | Upload date | edit |
|----------|---------|-----------|---------|-------------|------|
|----------|---------|-----------|---------|-------------|------|

4. Provide a partner barcode (internal name, if any), browse and upload a file. Once the file is uploaded, data are automatically parsed and loaded in the MicroAqua database. The "New microarraygpr" page will pop up to aid in .gpr upload. Follow the same procedure for uploading .gpr file and then for microarray image files produced from GenePix software, modified from Tiff image obtained from the scanner.

(i)

The screenshot shows the 'New Microarray \*.GAL File' form. At the top, there is a header with the MicroAqua logo, a user profile for 'partner1', and navigation links: 'Internal site', 'External site', and 'Reports'. Below this is a secondary navigation bar with links: 'Sampling site', 'Sampling', 'Filter sample', 'Nucleic acid', 'Oligo sequence', and 'Microarray experiments'. A third navigation bar contains links: 'Microarray .GAL', 'Microarray .GPR', 'Microarray Images', 'Microarray Analysis files', and 'Microarray Validations'. The main title is 'New Microarray \*.GAL File'. Below the title is a 'Back' link and a 'Create' button (highlighted with a green box). To the right of the 'Create' button is the text 'Create a new gal record'. The form is divided into a 'General data' section. It contains fields for 'Partner' (dropdown menu with '1 - UniCam'), 'Code' (dropdown menu with 'UniCam'), 'Partner barcode' (text input with 'miqua\_toxine'), 'Load the GAL file' (text input with '/home/kumar/Downloads/MicroAQUA\_microar' and a 'Browse...' button), and 'Uploaded at' (date selector with '2013', 'February', and '18'). A red arrow points to the 'Browse...' button with the text 'Browse your local computer filesystem to select the .gal file'. At the bottom, there is a 'Note' section with a text input field.

(ii)

The screenshot shows the 'New microarray .GPR' form. At the top, there is a header with the MicroAqua logo, a user profile for 'partner1', and navigation links: 'Internal site', 'External site', and 'Reports'. Below this is a secondary navigation bar with links: 'Sampling site', 'Sampling', 'Filter sample', 'Nucleic acid', 'Oligo sequence', and 'Microarray experiments'. A third navigation bar contains links: 'Microarray .GAL', 'Microarray .GPR', 'Microarray Images', 'Microarray Analysis files', and 'Microarray Validations'. A yellow banner at the top of the form area says 'Microarray GAL file is successfully saved. Upload GPR file or Create new Microarray Experiment by associating your GAL file!!!'. The main title is 'New microarray .GPR' (highlighted with a green box). Below the title is a 'Back' link and a 'Create' button. To the right of the 'Create' button is the text 'Creating a gal record will take the user to the new microarray .gpr page where user can upload .gpr file. Files can be loaded individually from their respective sections.' The form is divided into a 'General data' section. It contains fields for 'Partner' (dropdown menu with '1 - UniCam'), 'Code' (dropdown menu with 'UniCam'), 'Load the gpr file' (text input with '/home/kumar/Downloads/MicroAQUA\_microar' and a 'Browse...' button), and 'Uploaded at' (date selector with '2013', 'February', and '18'). A red arrow points to the 'Browse...' button with the text 'Browse your local computer file system to select the .gpr file'. At the bottom, there is a 'Note' section with a text input field.

5. On the "New Microarray image" page, user has to fill the relevant information about images and then click "Upload images". If clicked once, one file upload tag will appear. If clicked twice, two upload tags will appear and so on. Maximum three microarray images can be uploaded.

The basename of the image file will be utilized in the unique image code for individual image records.

6. Once the image file upload is finished, the page will be directed back to the "New Microarray Experiments" page where all the uploaded files can be associated together in one microarray experiment. Also, the sample utilized (from filter sample) can be associated with the performed microarray experiment.

7. Once the "Create" button is clicked, a new record is created for a microarray experiment, displaying all the associated files together in one row, on the index page of "Microarray Experiment" section.

The oligos utilized in this microarray experiment can be seen by clicking on the "+" sign, available at the beginning of each row.

The small displayed microarray image can be magnified by clicking on it. Generally, the displayed image is the first image of the "Microarray image" entry.

New experiment is successfully created (You can check the oligos, used in this experiment, by clicking on the "+" sign on individual experiments row!!!)

Microarray .GAL Microarray .GPR Microarray Images Microarray Analysis files Microarray Validations

### Microarray experiments

New microarray experiment

List of Microarray experiments: you can filter (using the lens icon in the bottom of the grid), sort (clicking on the header column), scroll the data in the grid (using the pagination system)

|   | Microarray exp. code | Filter sample | GAL code          | Partner                                  | GPR code   | Exp. date                   | Image      | Edit                                                                                                                |
|---|----------------------|---------------|-------------------|------------------------------------------|------------|-----------------------------|------------|---------------------------------------------------------------------------------------------------------------------|
| - | 1                    | E01-130219-01 | P03-110621-01-F01 | GAL-1-UniCam-maqua_toxine-20130218165630 | 1 - UniCam | GPR-1-UniCam-20130218170646 | 2013-02-19 |  <a href="#">Clickable image</a> |

Oligo Name edit

- McyB277M
- McyE445MA
- NdaH49232Nodspu
- gvpC7P
- McyA26MAP
- AoaB36638AphC
- McyA26MAP
- McyC1354M
- 16SrRNACy11267
- NdaG48367Nodspu
- McyB3253Ma
- McyB1032Ma
- McyE114Nod
- NdaE37248Nodspu

List of oligos utilized in that particular microarray experiment



8. The data parsed from the file are available in the sections under Microarray Experiment (Sub tables). Microarray GAL index page displays unique gal code, assigned to individual uploaded file, which differentiates between gal files.

partner1

Internal site External site Reports

Sampling site Sampling Filter sample Nucleic acid Oligo sequence Microarray experiments

Microarray .GAL Microarray .GPR Microarray Images Microarray Analysis files Microarray Validations

GAL file header GAL block information GAL oligo information

### Microarray Spots Information (.GAL)

New microarraygal

List of .gal files: you can filter (using the lens icon in the bottom of the grid), sort (clicking on the header column), scroll the data in the grid (using the pagination system)

|   | GAL code                                   | Partner    | GAL title                                 | Barcode        | Upload date | edit                 |
|---|--------------------------------------------|------------|-------------------------------------------|----------------|-------------|----------------------|
| 1 | GAL-1-UniCam-maqua_toxine-20130218165630   | 1 - UniCam | 20130218165630 µ-aqua_Toxine_17092012.gal | maqua_toxine   | 2013-02-18  | <a href="#">edit</a> |
| 2 | GAL-2-UniCam-maqua_toxine_2-20130218172847 | 1 - UniCam | 20130218172847 µ-aqua_Toxine_mod.gal      | maqua_toxine_2 | 2013-02-19  | <a href="#">edit</a> |
| 3 | GAL-3-UniCam-maqua_toxine_3-20130218173743 | 1 - UniCam | 20130218173743 µ-aqua_Toxine_modII.gal    | maqua_toxine_3 | 2013-02-19  | <a href="#">edit</a> |



9. The header, block and spot coordinates data are available in sub tables of "Microarray GAL". These data can be edited by clicking on the last column of individual record.

**Microarray GAL file Header information**

GAL file header information: you can filter (using the lens icon in the bottom of the grid), sort (clicking on the header column), scroll the data in the grid (using the pagination system)

|   | GAL ID | ATF Version | Rows# | Columns# | Block# | Block Type | Supplier | Upload date             | edit |
|---|--------|-------------|-------|----------|--------|------------|----------|-------------------------|------|
| 1 | 1      | 1           | 25    | 40       | 4      | 0          | Scienion | 2013-02-18 23:56:30 UTC |      |
| 2 | 2      | 1           | 25    | 40       | 4      | 0          | Scienion | 2013-02-19 00:28:47 UTC |      |
| 3 | 3      | 1           | 25    | 40       | 4      | 0          | Scienion | 2013-02-19 00:37:43 UTC |      |

GAL file block information: you can filter (using the lens icon in the bottom of the grid), sort (clicking on the header column), scroll the data in the grid (using the pagination system)

|    | GAL ID | Block#  | xOrigin | yOrigin | Feature Diameter | xFeature | xSpacing | yFeature | ySpacing | Upload date             | edit |
|----|--------|---------|---------|---------|------------------|----------|----------|----------|----------|-------------------------|------|
| 1  | 1      | Block:1 | 7000    | 6650    | 200              | 25       | 300      | 40       | 300      | 2013-02-18 23:56:30 UTC |      |
| 2  | 1      | Block:2 | 22500   | 6650    | 200              | 25       | 300      | 40       | 300      | 2013-02-18 23:56:30 UTC |      |
| 3  | 1      | Block:3 | 38000   | 6650    | 200              | 25       | 300      | 40       | 300      | 2013-02-18 23:56:30 UTC |      |
| 4  | 1      | Block:4 | 53500   | 6650    | 200              | 25       | 300      | 40       | 300      | 2013-02-18 23:56:30 UTC |      |
| 5  | 2      | Block:1 | 7000    | 6650    | 200              | 25       | 300      | 40       | 300      | 2013-02-18 23:56:30 UTC |      |
| 6  | 2      | Block:2 | 22500   | 6650    | 200              | 25       | 300      | 40       | 300      | 2013-02-18 23:56:30 UTC |      |
| 7  | 2      | Block:3 | 38000   | 6650    | 200              | 25       | 300      | 40       | 300      | 2013-02-18 23:56:30 UTC |      |
| 8  | 2      | Block:4 | 53500   | 6650    | 200              | 25       | 300      | 40       | 300      | 2013-02-18 23:56:30 UTC |      |
| 9  | 3      | Block:1 | 7000    | 6650    | 200              | 25       | 300      | 40       | 300      | 2013-02-18 23:56:30 UTC |      |
| 10 | 3      | Block:2 | 22500   | 6650    | 200              | 25       | 300      | 40       | 300      | 2013-02-18 23:56:30 UTC |      |
| 11 | 3      | Block:3 | 38000   | 6650    | 200              | 25       | 300      | 40       | 300      | 2013-02-18 23:56:30 UTC |      |
| 12 | 1      | Block:1 | 7000    | 6650    | 200              | 25       | 300      | 40       | 300      | 2013-02-18 23:56:30 UTC |      |
| 13 | 1      | Block:2 | 22500   | 6650    | 200              | 25       | 300      | 40       | 300      | 2013-02-18 23:56:30 UTC |      |
| 14 | 1      | Block:3 | 38000   | 6650    | 200              | 25       | 300      | 40       | 300      | 2013-02-18 23:56:30 UTC |      |
| 15 | 1      | Block:4 | 53500   | 6650    | 200              | 25       | 300      | 40       | 300      | 2013-02-18 23:56:30 UTC |      |
| 16 | 2      | Block:1 | 7000    | 6650    | 200              | 25       | 300      | 40       | 300      | 2013-02-18 23:56:30 UTC |      |
| 17 | 2      | Block:2 | 22500   | 6650    | 200              | 25       | 300      | 40       | 300      | 2013-02-18 23:56:30 UTC |      |
| 18 | 2      | Block:3 | 38000   | 6650    | 200              | 25       | 300      | 40       | 300      | 2013-02-18 23:56:30 UTC |      |
| 19 | 2      | Block:4 | 53500   | 6650    | 200              | 25       | 300      | 40       | 300      | 2013-02-18 23:56:30 UTC |      |
| 20 | 3      | Block:1 | 7000    | 6650    | 200              | 25       | 300      | 40       | 300      | 2013-02-18 23:56:30 UTC |      |
| 21 | 3      | Block:2 | 22500   | 6650    | 200              | 25       | 300      | 40       | 300      | 2013-02-18 23:56:30 UTC |      |
| 22 | 3      | Block:3 | 38000   | 6650    | 200              | 25       | 300      | 40       | 300      | 2013-02-18 23:56:30 UTC |      |
| 23 | 3      | Block:4 | 53500   | 6650    | 200              | 25       | 300      | 40       | 300      | 2013-02-18 23:56:30 UTC |      |

List of oligos in GAL file: you can filter (using the lens icon in the bottom of the grid), sort (clicking on the header column), scroll the data in the grid (using the pagination system)

|    | GAL code                                 | Array Information       | Oligo Name        | Upload date             | edit |
|----|------------------------------------------|-------------------------|-------------------|-------------------------|------|
| 1  | GAL-1-UniCam-maqua_toxine-20130218165630 | Block:1-Row:1-Column:1  | SxtA4813AphAL     | 2013-02-18 23:56:30 UTC |      |
| 2  | GAL-1-UniCam-maqua_toxine-20130218165630 | Block:1-Row:2-Column:1  | McyA169P          | 2013-02-18 23:56:30 UTC |      |
| 3  | GAL-1-UniCam-maqua_toxine-20130218165630 | Block:1-Row:3-Column:1  | 16S/rRNAChrOsc492 | 2013-02-18 23:56:30 UTC |      |
| 4  | GAL-1-UniCam-maqua_toxine-20130218165630 | Block:1-Row:4-Column:1  | McyB3253Ma        | 2013-02-18 23:56:30 UTC |      |
| 5  | GAL-1-UniCam-maqua_toxine-20130218165630 | Block:1-Row:5-Column:1  | McyE436Nod        | 2013-02-18 23:56:30 UTC |      |
| 6  | GAL-1-UniCam-maqua_toxine-20130218165630 | Block:1-Row:6-Column:1  | McyB449M          | 2013-02-18 23:56:31 UTC |      |
| 7  | GAL-1-UniCam-maqua_toxine-20130218165630 | Block:1-Row:7-Column:1  | McyC226M          | 2013-02-18 23:56:31 UTC |      |
| 8  | GAL-1-UniCam-maqua_toxine-20130218165630 | Block:1-Row:8-Column:1  | NdaI51028Nodspu   | 2013-02-18 23:56:31 UTC |      |
| 9  | GAL-1-UniCam-maqua_toxine-20130218165630 | Block:1-Row:9-Column:1  | AoaB36638AphC     | 2013-02-18 23:56:31 UTC |      |
| 10 | GAL-1-UniCam-maqua_toxine-20130218165630 | Block:1-Row:10-Column:1 | 16SAph657         | 2013-02-18 23:56:31 UTC |      |
| 11 | GAL-1-UniCam-maqua_toxine-20130218165630 | Block:1-Row:11-Column:1 | McyE440M          | 2013-02-18 23:56:31 UTC |      |
| 12 | GAL-1-UniCam-maqua_toxine-20130218165630 | Block:1-Row:12-Column:1 | McyD712Ma         | 2013-02-18 23:56:31 UTC |      |
| 13 | GAL-1-UniCam-maqua_toxine-20130218165630 | Block:1-Row:13-Column:1 | McyB2134P         | 2013-02-18 23:56:31 UTC |      |
| 14 | GAL-1-UniCam-maqua_toxine-20130218165630 | Block:1-Row:14-Column:1 | 16SRNAOscI522     | 2013-02-18 23:56:31 UTC |      |

10. The .gpr file is a result of analysis performed on scanner image files and consist of spot intensity data. The raw .gpr file, like .gal file, can be divided in to two sections, the header and the data. These information is available in different sub tables of "Microarray GPR".

**Microarray Experiment Data (.GPR)**

New microarray GPR

List of .gpr files: you can filter (using the lens icon in the bottom of the grid), sort (clicking on the header column), scroll the data in the grid (using the pagination system)

|   | GPR code                    | Partner    | GPR title                                  | Barcode | Upload date | edit |
|---|-----------------------------|------------|--------------------------------------------|---------|-------------|------|
| 1 | GPR-1-UniCam-20130218170646 | 1 - UniCam | 20130218170646 Toxin_2_rotated_1-3_cod.gpr |         | 2013-02-19  |      |
| 2 | GPR-2-UniCam-20130218172905 | 1 - UniCam | 20130218172905 Toxin_2_rotated_2-3_cce.gpr |         | 2013-02-19  |      |
| 3 | GPR-3-UniCam-20130218173757 | 1 - UniCam | 20130218173757 Toxin_2_rotated_3-3_Nod.gpr |         | 2013-02-19  |      |

11. The data available/displayed can also be edited and modified.

Microarray .GAL Microarray .GPR Microarray Images Microarray Analysis files Microarray Validations

GPR file header GPR results

## Microarray .GPR File Header Data

GPR file header information: you can filter (using the lens icon in the bottom of the grid), sort (clicking on the header column), scroll the data in the grid (using the pagination system)

| GPR ID | Version | Type              | Date            | Settings | Pix Size | Wavelength | Norm. method | Norm. factors | Std. dev. | Ratio formulation | Feature type | Barcode | Background sub. | Image Ori. | Jpeg Ori. | Creator           | Sc |
|--------|---------|-------------------|-----------------|----------|----------|------------|--------------|---------------|-----------|-------------------|--------------|---------|-----------------|------------|-----------|-------------------|----|
| 1      | 1       | GenePix Results 3 | 2012/10/19 14:* | "        | 5        | 635 532    | None         | 1 1           | Type 1    | W1/W2 (635/532)   | Circular     | "       | LocalFeature    | 2080, 4440 | 200, 504  | GenePix Pro 5. Ge |    |
| 2      | 1       | GenePix Results 3 | 2012/10/19 14:* | "        | 5        | 635 532    | None         | 1 1           | Type 1    | W1/W2 (635/532)   | Circular     | "       | LocalFeature    | 2080, 4440 | 200, 504  | GenePix Pro 5. Ge |    |
| 3      | 1       | GenePix Results 3 | 2012/10/19 14:* | "        | 5        | 635 532    | None         | 1 1           | Type 1    | W1/W2 (635/532)   | Circular     | "       | LocalFeature    | 2080, 4440 | 200, 504  | GenePix Pro 5. Ge |    |

Data in a GPR file: you can filter (using the lens icon in the bottom of the grid), sort (clicking on the header column), scroll the data in the grid (using the pagination system)

| GPR code                    | Array Information                           | X    | Y    | Diameter | F635 me | F635 me | F635 SD | F635 CV | B635 | B635 me | B635 me | B635 SD | B635 CV | % B635 + | % B635 + | F635 % s | F632 |
|-----------------------------|---------------------------------------------|------|------|----------|---------|---------|---------|---------|------|---------|---------|---------|---------|----------|----------|----------|------|
| GPR-1-UniCam-20130218170646 | Block-1-Row:1-Column:1-Oligo:SxtA4813AphAL  | 2990 | 5445 | 200      | 378     | 380     | 83      | 21      | 419  | 419     | 426     | 122     | 28      | 2        | 0        | 0        | 447  |
| GPR-1-UniCam-20130218170646 | Block-1-Row:1-Column:2-Oligo:gvpC415P       | 3290 | 5445 | 200      | 393     | 397     | 82      | 20      | 429  | 429     | 443     | 138     | 31      | 2        | 0        | 0        | 437  |
| GPR-1-UniCam-20130218170646 | Block-1-Row:1-Column:3-Oligo:16SRNAOscil522 | 3600 | 5455 | 165      | 36136   | 26324   | 13242   | 50      | 448  | 448     | 488     | 169     | 34      | 100      | 100      | 0        | 465  |
| GPR-1-UniCam-20130218170646 | Block-1-Row:1-Column:4-Oligo:AoaC26787AphC  | 3890 | 5445 | 200      | 379     | 360     | 230     | 63      | 439  | 439     | 456     | 121     | 26      | 2        | 0        | 0        | 450  |
| GPR-1-UniCam-20130218170646 | Block-1-Row:1-Column:5-Oligo:NdaB5804Hodspu | 4190 | 5445 | 200      | 381     | 384     | 89      | 23      | 432  | 432     | 443     | 99      | 22      | 5        | 0        | 0        | 456  |
| GPR-1-UniCam-20130218170646 | Block-1-Row:1-Column:6-Oligo:16SApha657     | 4495 | 5450 | 155      | 41854   | 29055   | 16462   | 56      | 440  | 440     | 480     | 162     | 33      | 100      | 100      | 0        | 428  |
| GPR-1-UniCam-20130218170646 | Block-1-Row:1-Column:7-Oligo:16SrR589P      | 4790 | 5445 | 200      | 400     | 404     | 84      | 20      | 427  | 427     | 443     | 115     | 25      | 5        | 0        | 0        | 484  |
| GPR-1-UniCam-20130218170646 | Block-1-Row:1-Column:8-Oligo:16SApha647     | 5100 | 5445 | 100      | 835     | 840     | 131     | 15      | 432  | 432     | 436     | 79      | 18      | 99       | 98       | 0        | 368  |
| GPR-1-UniCam-20130218170646 | Block-1-Row:1-Column:9-Oligo:McyE617M       | 5390 | 5445 | 200      | 375     | 378     | 88      | 23      | 430  | 430     | 438     | 246     | 56      | 0        | 0        | 0        | 451  |
| GPR-1-UniCam-20130218170646 | Block-1-Row:1-Column:10-Oligo:McyA191P      | 5690 | 5445 | 200      | 390     | 394     | 82      | 20      | 425  | 425     | 430     | 105     | 24      | 4        | 0        | 0        | 480  |
| GPR-1-UniCam-20130218170646 | Block-1-Row:1-Column:11-Oligo:McyE783A      | 5990 | 5445 | 200      | 394     | 391     | 100     | 25      | 430  | 430     | 434     | 78      | 17      | 10       | 1        | 0        | 472  |
| GPR-1-UniCam-20130218170646 | Block-1-Row:1-Column:12-Oligo:McyC1022A     | 6290 | 5445 | 200      | 382     | 389     | 86      | 22      | 429  | 429     | 433     | 84      | 19      | 7        | 0        | 0        | 483  |
| GPR-1-UniCam-20130218170646 | Block-1-Row:1-Column:13-Oligo:16SrR718N     | 6590 | 5445 | 200      | 396     | 400     | 87      | 21      | 425  | 425     | 430     | 108     | 25      | 4        | 0        | 0        | 491  |
| GPR-1-UniCam-20130218170646 | Block-1-Row:1-Column:14-Oligo:McyB2097P     | 6890 | 5445 | 200      | 373     | 373     | 89      | 23      | 421  | 421     | 425     | 99      | 23      | 5        | 0        | 0        | 453  |
| GPR-1-UniCam-20130218170646 | Block-1-Row:1-Column:15-Oligo:McyE223M      | 7190 | 5445 | 200      | 312     | 318     | 70      | 22      | 423  | 423     | 434     | 101     | 23      | 0        | 0        | 0        | 367  |
| GPR-1-UniCam-20130218170646 | Block-1-Row:1-Column:16-Oligo:McyC3366A     | 7490 | 5445 | 200      | 383     | 381     | 86      | 22      | 417  | 417     | 420     | 72      | 17      | 10       | 1        | 0        | 455  |
| GPR-1-UniCam-20130218170646 | Block-1-Row:1-Column:17-Oligo:McvA1703Ma    | 7790 | 5445 | 200      | 367     | 369     | 85      | 23      | 415  | 415     | 418     | 72      | 17      | 7        | 1        | 0        | 448  |

**NOTE:** The uploaded files can be downloaded at anytime from the microaqua server by clicking on the first column of the grid/index which usually displays all the information related to that entry.

12. The index page of the "Microarray Image" section displays unique code generated for individual entry and also shows other related information. Each individual image entry can have maximum 3 images, available from the "Details" column (first column of the grid). The images can be replaced and entries can be modified from the "Edit" column.

Internal site External site Reports

Sampling site Sampling Filter sample Nucleic acid Oligo sequence Microarray experiments

Microarray .GAL Microarray .GPR Microarray Images Microarray Analysis files Microarray Validations

## Microarray Images

Upload new image file

List of microarray image files: you can filter (using the lens icon in the bottom of the grid), sort (clicking on the header column), scroll the data in the grid (using the pagination system)

| Details | Image Code              | Name        | Image ID | Channel  | Status | Upload date         | ed |
|---------|-------------------------|-------------|----------|----------|--------|---------------------|----|
| 1       | MG-1-UniCam-2-A1-01a_R1 | PTR1_image1 | 2        | multiple | True   | 2013-02-19 00:23:56 |    |
| 1       | MG-2-UniCam-2-A1-01a_W1 | PTR1_image2 | 3        | multiple | True   | 2013-02-19 00:30:57 |    |
| 1       | MG-3-UniCam-2-A1-01a_W2 | PTR1_image3 | 13       | multiple | True   | 2013-02-19 00:39:24 |    |

Displays information on individual records

Unique Image code

Replace image files or modify image data
