# Supplementary material
Source: MDPI journal article supplement (https://www.mdpi.com/1660-4601/12/6/6352)
Supplement: s1 [file s1]

## Samplings

Each water sample is linked to one sampling site and can have several filter samples (visible clicking on the + on the sample).

**Samplings**

[New sampling](#)

List of samplings: you can filter (using the lens icon in the bottom of the grid), sort (clicking on the header column), scroll the data in the grid (using the pagination system)

|   |   | Code          | Sampling site                      | Volume (lt) | Partner    | Equipment | edit |
|---|---|---------------|------------------------------------|-------------|------------|-----------|------|
| + | i | P03-110705-01 | CANET / Canet Saint Nazaire lagoon | 43.0        | 3 - UPMC   | bucket    |      |
| + | i | P03-110809-01 | CANET / Canet Saint Nazaire lagoon | 10.0        | 3 - UPMC   | bucket    |      |
| + | i | P03-110926-01 | CANET / Canet Saint Nazaire lagoon | 10.0        | 3 - UPMC   | bucket    |      |
| + | i | P03-111019-02 | CANET / Canet Saint Nazaire lagoon | 10.0        | 3 - UPMC   | bucket    |      |
| + | i | P01-111123-02 | CANET / Canet Saint Nazaire lagoon | 30.0        | 1 - UniCam | ?         |      |
| + | i | P01-110101-01 | CANET / Canet Saint Nazaire lagoon | 3.0         | 1 - UniCam | ?         |      |
| + | i | P03-111115-01 | CANET / Canet Saint Nazaire lagoon | 10.0        | 3 - UPMC   | bucket    |      |
| + | i | P03-120307-01 | CANET / Canet Saint Nazaire lagoon | 10.0        | 3 - UPMC   | bucket    |      |
| + | i | P03-120403-01 | CANET / Canet Saint Nazaire lagoon | 10.0        | 3 - UPMC   | bucket    |      |
| + | i | P03-120403-02 | CANET / Canet Saint Nazaire lagoon | 10.0        | 3 - UPMC   | bucket    |      |
| + | i | P03-120509-01 | CANET / Canet Saint Nazaire lagoon | 12.0        | 3 - UPMC   | ?         |      |

Click on the link "*New sampling*" to access the creation page

# New sampling

[Back](#)

Create

click here when you finish to insert all data

## GENERAL DATA

Sampling site

CANET Canet Saint Nazaire lagoon

Sampling date

2011 November 23

Partner

1 - UniCam

Volume (liter)

Important value

Operators

Set here the general data regarding the water sample

Create

## ASSOCIATED FILTER SAMPLES

Pore size (μ) n° Filter Volume (lt) Partner Barcode Note

Protocol gradient for filter samplings

raw concentrate

0

20.0

0

10.0

0

5.0

0

3.0

0

2.47

0

2.0

0

1.2

0

0.8

0

0.45

0

0.1

0

viruses (0.025μm)

0

Rapid insertion of several filter samples

Some or all filter samples can remain empty as it is possible to insert each sample in a following moment

## ENVIRONMENTAL DATA

Air temperature (°C)

0.0

Water temperature (°C)

0.0

Moisture (g/kg)

0.0

Wind speed (m/s)

0.0

Wind direction

Water flow (lt/s)

0.0

Light intensity (lx)

0.0

Rainfall events (mm)

0.0

Depth (meters)

0.0

Turbidity (meters)

0.0

Tidal range (m)

0.0

Conductivity (μS/cm)

0.0

Phosphates

0.0

Nitrates

0.0

pH

0.0

Nitrogen (%)

0.0

Biochemical oxygen demand or B.O.D (mg/L)

0.0

COD chemical oxygen demand (mg/L)

0.0

O<sub>2</sub> oxygen saturation

0.0

Other contextual data for the water sample

Note

## Filter Sample

A partner customized barcode can be associated to each filter sample.

As for the samplings the system generates automatically a MicroAqua code.

The screenshot displays the 'Filter samples' page of a web application. At the top, there is a header with a logo on the left, a user profile 'partner1' in the center, and navigation links 'Internal site', 'External site', and 'Reports' on the right. Below the header, a secondary navigation bar contains links for 'Sampling site', 'Sampling', 'Filter sample' (which is highlighted), 'Nucleic acid', 'Oligo sequence', and 'Microarray experiments'. Further down, there are two more links: 'protocol filter' and 'preparation filter'. The main heading 'Filter samples' is prominently displayed. Below it, a link 'New filter sample' is available. The core of the page is a table titled 'List of filter samples: you can filter (using the lens icon in the bottom of the grid), sort (clicking on the header column), scroll the data in the grid (using the pagination system)'. The table has columns for 'Code', 'Sampling', 'Partner barcode', 'pore size (µm)', 'n° Tube', and 'Volume (lt)'. It contains 16 rows of data, each representing a filter sample with its specific details.

|   |   | Code              | Sampling       | Partner barcode              | pore size (µm)    | n° Tube | Volume (lt) | e |
|---|---|-------------------|----------------|------------------------------|-------------------|---------|-------------|---|
| + | i | P03-110621-01-F07 | AMELIE 60.0 lt | FR3110621AM0025_1:_4         | viruses (0.025µm) | 4       | 1.0         |   |
| + | i | P03-110627-01-F08 | SOLA 40.0 lt   | FR3110627SO0025_1:_4         | viruses (0.025µm) | 4       | 1.38        |   |
| + | i | P03-110705-01-F11 | CANET 43.0 lt  | FR3110705CA0025_1:_4         | viruses (0.025µm) | 4       | 0.4         |   |
| + | i | P03-110726-01-F08 | AMELIE 40.0 lt | FR3110726AM0025_1:_4         | viruses (0.025µm) | 4       | 1.0         |   |
| + | i | P03-110801-01-F08 | SOLA 40.0 lt   | FR3110801SO0025_1:_4         | viruses (0.025µm) | 4       | 1.0         |   |
| + | i | P03-110809-01-F09 | CANET 10.0 lt  | FR3110809CA0025_1:_4         | viruses (0.025µm) | 4       | 0.5         |   |
| + | i | P03-110912-01-F08 | SOLA 40.0 lt   | FR3110912SO0025_1:_4         | viruses (0.025µm) | 4       | 1.0         |   |
| + | i | P03-110921-01-F08 | AMELIE 40.0 lt | FR3110921AM0025_1:_4         | viruses (0.025µm) | 4       | 1.0         |   |
| + | i | P03-110926-01-F08 | CANET 10.0 lt  | FR3110926CA0025_1:_10        | viruses (0.025µm) | 4       | 0.4         |   |
| + | i | P03-111011-01-F09 | SOLA 50.0 lt   | FR3111010SO0025_1/_2 viruses | viruses (0.025µm) | 2       | 0.8         |   |
| + | i | P03-111019-01-F09 | AMELIE 50.0 lt | FR3111019AM_1_2 viruses      | viruses (0.025µm) | 2       | 0.8         |   |
| + | i | P03-111019-02-F09 | CANET 10.0 lt  | FR3111024CA0025_1/_2 viruses | viruses (0.025µm) | 2       | 0.8         |   |
| + | i | P03-120403-02-F09 | CANET 10.0 lt  | FR3120403CA_1/_2 viruses     | viruses (0.025µm) | 2       | 0.0         |   |
| + | i | P03-141407-01-F08 | SOLA 40.0 lt   | FR31141407SO_1:_4            | viruses (0.025µm) | 4       | 0.0         |   |

Clicking on "New filter sample" it is possible to reach the page for creating a single filter sample (to be associated to a water sample).
