# Supplementary material
Source: MDPI journal article supplement (https://www.mdpi.com/1660-4601/12/6/6352)
Supplement: s1 [file s1]

## Taxonomy Browser

For MicroAQUA, probes have been designed for taxonomic groups like class level, clade level, genus and species level. The hierarchical probes make it easier to analyze environmental samples. For the species level probe to be present, the entire taxonomic hierarchy above the species probe has to be present. If the taxonomic hierarchy shows no signal, then the signal from the species probe can be considered to be a false positive.

To assign probes, saved in database, a "Taxonomy browser" is implemented on the MicroAqua internal website.

The following instruction will explain how to make use of the taxonomy browser tool :

1. To access the browser, click on the edit button, the last column of the grid, of individual row/probe.

Internal site External site Reports

Sampling site Sampling Filter sample Nucleic acid Oligo sequence Microarray experiments

Oligo Sequence File Upload

### Oligo sequences

New oligo sequence

Export all oligos as CSV(Excel) Export selected oligos as CSV

List of oligo sequences: you can filter (using the lens icon in the bottom of the grid), sort (clicking on the header column), scroll the data in the grid (using the pagination system)

| Data | PartnerCode   | Description           | DNASequence                | Partner    | Person         | TaxName          | TaxID  | Sele                                | edit |
|------|---------------|-----------------------|----------------------------|------------|----------------|------------------|--------|-------------------------------------|------|
| +    | AMP_COF_P29   | Amphora coffeaeformis | TCGTGCGCGTCTGGCTCCACAATTC  | 1 - UniCam | SPURIO Roberto | cellular organik | 131567 | <input checked="" type="checkbox"/> |      |
| +    | AMP_COF_P29_R | Amphora coffeaeformis | CGCTGCGCAACCGGAATGCATCATC  | 1 - UniCam | SPURIO Roberto | Amphora          | 59796  | <input checked="" type="checkbox"/> |      |
| +    | AMP_COF_P22   | Amphora coffeaeformis | TTCTTCCTCGTCGCGTCTGGCTCC   | 1 - UniCam | SPURIO Roberto |                  |        | <input checked="" type="checkbox"/> |      |
| +    | AMP_COF_P22_R | Amphora coffeaeformis | GGATCCCGGCGCTGCGCAACCGCGAA | 1 - UniCam | SPURIO Roberto |                  |        | <input checked="" type="checkbox"/> |      |
| +    | AMP_COF_P25   | Amphora coffeaeformis | CGAGATTTCCTGCGCGCGCGCACA   | 1 - UniCam | SPURIO Roberto |                  |        | <input checked="" type="checkbox"/> |      |
| +    | AMP_COF_P25_R | Amphora coffeaeformis | CCAGACCGACAAGGCGACCCACGGCT | 1 - UniCam | SPURIO Roberto |                  |        | <input checked="" type="checkbox"/> |      |
| +    | AMP_COF_P20   | Amphora coffeaeformis | CGCTCTCGTTCTGTTGATGATGCC   | 1 - UniCam | SPURIO Roberto |                  |        | <input checked="" type="checkbox"/> |      |
| +    | AMP_COF_P20_R | Amphora coffeaeformis | GCTTTCTGCTCGATGTCGAAGAAC   | 1 - UniCam | SPURIO Roberto |                  |        | <input checked="" type="checkbox"/> |      |

2. Scroll down to the "Organism" field set, and either enter a name of the species against which the oligo was designed or, if available, enter the NCBI taxomic ID and click "Find"

DNA probe sequence (5'→3')

TTCTTCCTCGTCGCGTCTGGCTCC

### ORGANISM

Taxonomy database maintained by NCBI/GenBank

Taxonomy identifier

Research using taxonomy names: Amphora Find by name

Taxonomy name

Research using taxonomy id: Find by id(s)

Taxonomy database maintained by NCBI/GenBank

Additional data

Length: 26; Tm: 68.5; GC Content: 65.4 Random sequence

Search using species name or any name belonging to any taxonomy level

Search using NCBI taxonomic unique identifier

3. The browser will display a complete classification of the species and all the levels available for the particular species in NCBI database. To select any level and ID, simply click on the button, available in front of names in green.

ORGANISM

Taxonomy database maintained by NCBI/GenBank

Research using taxonomy name:

|         |         |         |         |         |         |        |                             |
|---------|---------|---------|---------|---------|---------|--------|-----------------------------|
| 1268808 | 1203290 | 1191075 | 1191017 | 1136018 | 1052887 | 876348 | Research using taxonomy id: |
| 655748  | 654885  | 654884  | 650507  | 565056  | 565055  | 565054 |                             |
| 555830  | 538918  | 431337  | 431329  | 431328  | 431327  | 431326 |                             |
| 288119  | 284695  | 265586  | 265554  | 216748  | 216711  | 97221  |                             |

63140 59796 1268808,1203290,1191075

- | 131567: cellular organisms --> [no rank] ☒ ☒
- | 2759: Eukaryota --> [superkingdom] ☒ ☒
- | 33634: Stramenopiles --> [no rank] ☒ ☒
- | 2836: Bacillariophyta --> [phylum] ☒ ☒
- | 33849: Bacillariophyceae --> [class] ☒ ☒
- | 33850: Bacillariophycidae --> [no rank] ☒ ☒
- | 216738: Thalassiosyrphales --> [order] ☒ ☒
- | 59795: Catenulaceae --> [family] ☒ ☒
- | 59796: Amphora --> [genus] ☒ ☒
- | 1268808: Amphora sp. M4CC4 --> [species] ☒ ☒
- | 1203290: Amphora sp. RH-2012 --> [species] ☒ ☒

select any taxonomic name/ID by clicking the green button

4. The selected oligo will automatically get updated with the taxonomy name and ID.

## Oligo sequences

New oligo sequence

Export all oligos as CSV(Excel)

Export selected oligos as CSV

List of oligo sequences: you can filter (using the lens icon in the bottom of the grid), sort (clicking on the header column), scroll the data in the grid (using the pagination system)

| Det | PartnerCode   | Description             | DNASequence               | Partner    | Person         | TaxName           | TaxID  | Sele                                | edit                                |
|-----|---------------|-------------------------|---------------------------|------------|----------------|-------------------|--------|-------------------------------------|-------------------------------------|
| + i | AMP_COF_P29   | Amphora coffeaformis    | TCGTCGCCGTCTGGCTCCACAATTC | 1 - UniCam | SPURIO Roberto | cellular organism | 131567 | <input checked="" type="checkbox"/> | <input type="button" value="edit"/> |
| + i | AMP_COF_P29_R | Amphora coffeaformis    | CGCTGCGCAACCGCAATGCATCATC | 1 - UniCam | SPURIO Roberto | Amphora           | 59796  | <input checked="" type="checkbox"/> | <input type="button" value="edit"/> |
| + i | Amp_COF_P22   | Amphora coffeaformis    | TTCTTCCTCGTCGCCGTCTGGCTCC | 1 - UniCam | SPURIO Roberto | Amphora           | 59796  | <input checked="" type="checkbox"/> | <input type="button" value="edit"/> |
| + i | Amp_COF_P22_R | Amphora coffeaformis    | GGATCCCGCGCTGCGCAACGCGCA  | 1 - UniCam | SPURIO Roberto |                   |        | <input checked="" type="checkbox"/> | <input type="button" value="edit"/> |
| + i | Amp_COF_P25   | Amphora coffeaformis    | CGAGATTCTCGCCCGCGCGCAC    | 1 - UniCam | SPURIO Roberto |                   |        | <input checked="" type="checkbox"/> | <input type="button" value="edit"/> |
| + i | Amp_COF_P25_R | Amphora coffeaformis    | CCAGACCGACAAGCGACCCACGG   | 1 - UniCam | SPURIO Roberto |                   |        | <input checked="" type="checkbox"/> | <input type="button" value="edit"/> |
| + i | AMP_COF_P20   | Amphora coffeaformis    | CGCTCTCGTTCCTGTTGATGATGCC | 1 - UniCam | SPURIO Roberto |                   |        | <input checked="" type="checkbox"/> | <input type="button" value="edit"/> |
| + i | AMP_COF_P20_R | Amphora coffeaformis    | GCTTTCTGCTCGATGTCGAAGAAC  | 1 - UniCam | SPURIO Roberto |                   |        | <input checked="" type="checkbox"/> | <input type="button" value="edit"/> |
| + i | AMP_COF_P21   | Amphora coffeaformis    | ACCGGCACCATCAGCAGCACGACA  | 1 - UniCam | SPURIO Roberto |                   |        | <input checked="" type="checkbox"/> | <input type="button" value="edit"/> |
| + i | AMP_COF_P21_R | Amphora coffeaformis    | GCCAGGTGGTGGCGGATGAGGGCA  | 1 - UniCam | SPURIO Roberto |                   |        | <input checked="" type="checkbox"/> | <input type="button" value="edit"/> |
| + i | NIT_DIS_P24   | Nitzschia dissipata (R) | GACGCGCAACATCGCCGACATGAA  | 1 - UniCam | SPURIO Roberto |                   |        | <input checked="" type="checkbox"/> | <input type="button" value="edit"/> |
| + i | NIT_DIS_P24_R | Nitzschia dissipata (R) | CAACACTGGTTCCACTTGTAGTAGC | 1 - UniCam | SPURIO Roberto |                   |        | <input checked="" type="checkbox"/> | <input type="button" value="edit"/> |
| + i | NIT_DIS_P27   | Nitzschia dissipata (R) | CCGACTCGATCGCGGCTCTGAT    | 1 - UniCam | SPURIO Roberto |                   |        | <input checked="" type="checkbox"/> | <input type="button" value="edit"/> |

Selected taxonomic name and ID are automatically displayed
