# Supplementary material
Source: MDPI journal article supplement (https://www.mdpi.com/1660-4601/12/6/6352)
Supplement: s1 [file s1]

## Batch upload of data files

### Samplings Oligo Sequence

Batch upload of data files is implemented on the MicroAqua internal website to ease uploading and parsing large chunks of data. Currently this functionality is available for "Sampling" and "Oligo sequence" data.

1. Click on the button for "sampling batch file upload", under Samplings section.

Upload multiple sampling files in one click

Samplings Batch File Upload

### Samplings

New sampling

List of samplings: you can filter (using the lens icon in the bottom of the grid), sort (clicking on the header column), scroll the data in the grid (using the pagination system)

|   | Code          | Sampling site                      | Volume (lt) | Partner    | Equipment | edit |
|---|---------------|------------------------------------|-------------|------------|-----------|------|
| + | P03-110705-01 | CANET / Canet Saint Nazaire lagoon | 43.0        | 3 - UPMC   | bucket    |      |
| + | P03-110809-01 | CANET / Canet Saint Nazaire lagoon | 10.0        | 3 - UPMC   | bucket    |      |
| + | P03-110926-01 | CANET / Canet Saint Nazaire lagoon | 10.0        | 3 - UPMC   | bucket    |      |
| + | P03-111019-02 | CANET / Canet Saint Nazaire lagoon | 10.0        | 3 - UPMC   | bucket    |      |
| + | P01-111123-02 | CANET / Canet Saint Nazaire lagoon | 30.0        | 1 - UniCam | ?         |      |
| + | P01-110101-01 | CANET / Canet Saint Nazaire lagoon | 3.0         | 1 - UniCam | ?         |      |
| + | P03-111115-01 | CANET / Canet Saint Nazaire lagoon | 10.0        | 3 - UPMC   | bucket    |      |
| + | P03-120307-01 | CANET / Canet Saint Nazaire lagoon | 10.0        | 3 - UPMC   | bucket    |      |
| + | P03-120403-01 | CANET / Canet Saint Nazaire lagoon | 10.0        | 3 - UPMC   | bucket    |      |
| + | P03-120403-02 | CANET / Canet Saint Nazaire lagoon | 10.0        | 3 - UPMC   | bucket    |      |

2. The data file can be uploaded in formats like .csv(comma separated values) or .tsv(tab separated values). A template for the sample data file is available at the link "Download an example of sampling file". Just download it and fill it with your data.

New Samplings Multiple File Upload (\*.csv or \*.tsv)

Back

Add Files

Save Files

Download an example of sampling file

Download an example sampling file having a proper sampling file format. Files will only be uploaded in this particular format.

3. To fill data in the example file, some rules have to be taken care of:

a) In the first field, Sampling Site, fill the blank field by Sampling Site Code. Codes are available in the index table of *MicroAqua internal website* > *Sampling Site*.

| A             | B       | C                         | D      | E       | F         | G        | H        | I          | J              | K          | L          | M              | N     | O         | P        | Q           | R    |
|---------------|---------|---------------------------|--------|---------|-----------|----------|----------|------------|----------------|------------|------------|----------------|-------|-----------|----------|-------------|------|
| Sampling Site | Partner | Sampling date(YYYY-MM-DD) | Volume | Comment | Air Temp. | Moisture | Pressure | Wind Speed | Wind Direction | Water Flow | Light Int. | Rainfall exts. | Depth | Turbidity | Salinity | Tidal Range | Open |
|               |         |                           |        |         |           |          |          |            |                |            |            |                |       |           |          |             |      |
|               |         |                           |        |         |           |          |          |            |                |            |            |                |       |           |          |             |      |
|               |         |                           |        |         |           |          |          |            |                |            |            |                |       |           |          |             |      |

**Sampling sites**

Use the Code names to fill the "Sampling Site" field in the Example file

| Code       | Name                            | Water use        | Water type    | Land            | Geo pos.                          |
|------------|---------------------------------|------------------|---------------|-----------------|-----------------------------------|
| CANET      | Canet Saint Nazaire lagoon      | Recreative water | Surface water | Grazing land    | Canet Saint Nazaire lagoon (Fr    |
| SOLA       | SOLA station                    | Recreative water | Surface water | Grazing land    | SOLA station (France)             |
| SCHWENTINE | Schwentine                      | Recreative water | Surface water | Grazing land    | Schwentine (Germany)              |
| MONDONY    | Mondony river                   | Recreative water | Surface water | Grazing land    | Mondony river (France)            |
| SAPANCA    | Lake of Sapanca                 | Recreative water | Surface water | Grazing land    | Lake of Sapanca (Turkey)          |
| POTENZA    | River Potenza (Fonte di Bresc   | Resource water   | Surface water | Grazing land    | River Potenza (Fonte di Bresc     |
| FIASTRA    | Lake of Fiastra (100 m far from | Recreative water | Lake          | Artificial area | Lake of Fiastra (100 m far from   |
| CHIANTI    | River Chienti (Piediripa)       | Resource water   | Surface water | Open spaces     | River Chienti (Piediripa) (Italy) |
| AMELIE     | Mondony river                   | Recreative water | Surface water | Grazing land    | AMELIE (France)                   |
| Dodder     | River Dodder in Dublin urban ar | Resource water   | River         | Urban           | Dodder Dublin (Ireland)           |

b) For Partners field, put the Partners code (in upper or lower case). Refer to the following list or check the codes from the MicroAqua website *Partners* page (<http://www.microaqua.eu/beneficiaries>).

|                                                      |         |
|------------------------------------------------------|---------|
| University of Camerino                               | UNICAM  |
| University of Portsmouth                             | UniPort |
| Universite Pierre et Marie Curie                     | UPMC    |
| Veolia Environment Recherche et innovation           | VERI    |
| Istituto Superiore Di Sanita                         | ISS     |
| University of Ireland, Dublin                        | UCD     |
| National Center of Infectious and Parasitic Diseases | NCIPD   |
| Queens University Belfast                            | QUB     |
| MariLim Gesellschaft fur Gewasseruntersuchung mbH    | Marilim |
| Istanbul University                                  | Unilst  |
| Universidade de Santiago de Compostela               | USC     |
| Scienion AG, Berlin                                  | SCIE    |

Home Project **Partners** Background Calendar GANTT Troubleshooting

Home

## List of participants



**Partner : 1**  
**UNIVERSITA DEGLI STUDI DI CAMERINO**  
**Principal investigator:**  
 Gualerzi Claudio (claudio.gualerzi@unicam.it)



**UNIVERSITY OF PORTSMOUTH HIGHER EDUCATION CORPORATION**  
**Principal investigator:**  
 Hayes Paul Kelvin (paul.hayes@port.ac.uk)

**Partner Code**

UniCam Italy [Read more](#)

UniPort United Kingdom [Read more](#)

Save the Example file with the name of your choice and now its ready to be uploaded.

**NOTE1:** The file is already in .CSV format. There is no need to change the format of the file.

**NOTE2:** It is essential to fill in all the field available in the Example file. If the Partner has no data for the respective field, especially for Enviornmental data like pressure, moisture etc, just put "0.0" value in the field. Do not leave any field blank.

4. Once the data files are ready, simply click on "Add files" button *multiple times* to get the file upload tag. Maximum of 10 files can be uploaded together with one click. Just browse your files and provide the location. Then click on "Save Files". A unique sampling code will be assigned to individual rows with in the data file. Once the data is parsed sucessfully, filter samples can be associated manually with each sampling entry.

New Samplings Multiple File Upload (\*.csv or \*.tsv) [Download an example of sampling file](#)

Back

**Add Files** **Save Files**

**Browse your local computer filesystem to select sampling files(s)**



5. The same procedure has to be followed with "Oligo Sequence" batch files.

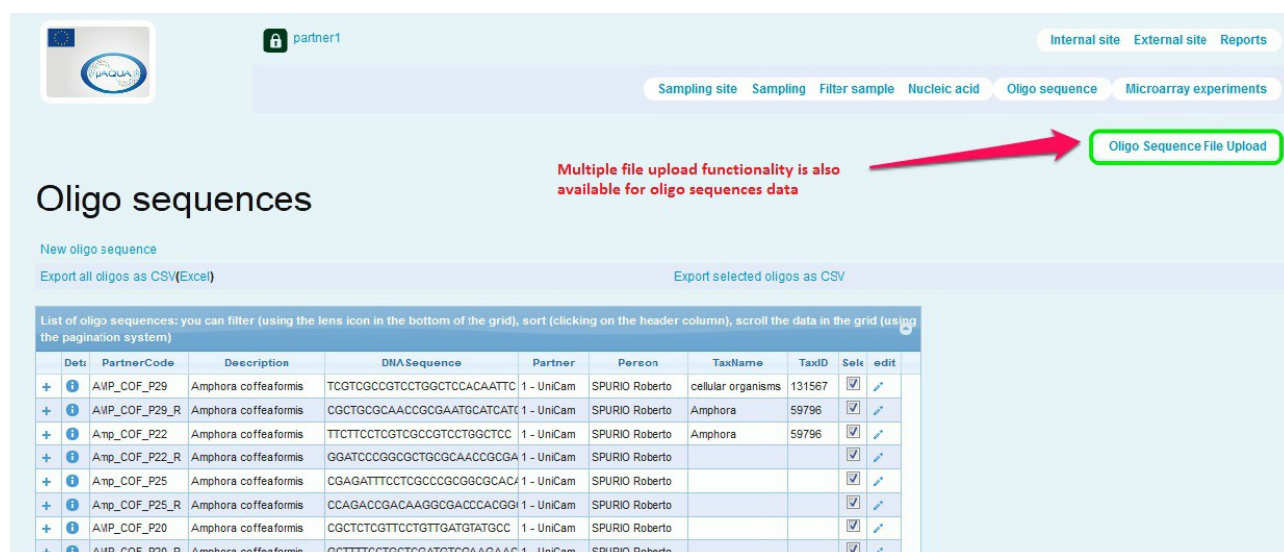

Internal site External site Reports

Sampling site Sampling Filter sample Nucleic acid Oligo sequence Microarray experiments

**Oligo sequences**

New oligo sequence

Export all oligos as CSV(Excel) Export selected oligos as CSV

List of oligo sequences: you can filter (using the lens icon in the bottom of the grid), sort (clicking on the header column), scroll the data in the grid (using the pagination system)

| Deti | PartnerCode    | Description          | DNASequence                | Partner    | Person         | TaxName            | TaxID  | Sele                                | edit |
|------|----------------|----------------------|----------------------------|------------|----------------|--------------------|--------|-------------------------------------|------|
| + i  | AMP_COF_P29    | Amphora coffeiformis | TCGTGCGCGTCTGGCTCCACAATTC  | 1 - UniCam | SPURIO Roberto | cellular organisms | 131567 | <input checked="" type="checkbox"/> |      |
| + i  | AMP_COF_P29_R  | Amphora coffeiformis | CGCTGCGCAACCGCGAATGCATCATC | 1 - UniCam | SPURIO Roberto | Amphora            | 59796  | <input checked="" type="checkbox"/> |      |
| + i  | Atmp_COF_P22   | Amphora coffeiformis | TTCTTCTCTGTCGCGCTCTGCTCC   | 1 - UniCam | SPURIO Roberto | Amphora            | 59796  | <input checked="" type="checkbox"/> |      |
| + i  | Atmp_COF_P22_R | Amphora coffeiformis | GGATCCCGGCGCTGCGCAACCGCGA  | 1 - UniCam | SPURIO Roberto |                    |        | <input checked="" type="checkbox"/> |      |
| + i  | Atmp_COF_P25   | Amphora coffeiformis | CGAGATTCTCTGCGCGCGCGCAC    | 1 - UniCam | SPURIO Roberto |                    |        | <input checked="" type="checkbox"/> |      |
| + i  | Atmp_COF_P25_R | Amphora coffeiformis | CCAGACGACAAAGCGGACCGG      | 1 - UniCam | SPURIO Roberto |                    |        | <input checked="" type="checkbox"/> |      |
| + i  | AMP_COF_P20    | Amphora coffeiformis | CGCTCTGTTCTGTTGATGTATGCC   | 1 - UniCam | SPURIO Roberto |                    |        | <input checked="" type="checkbox"/> |      |
| + i  | AMP_COF_P20_R  | Amphora coffeiformis | GCTTTTCTGCTCGATGTCGAAGAAC  | 1 - UniCam | SPURIO Roberto |                    |        | <input checked="" type="checkbox"/> |      |

6. In the example file, fill the *Partner* field with partner code and *Person* field with the Firstnames of the person uploading the file. For partner please refer to the section 3.b above and for Persons, please refer the following image. Firstnames of all the persons involved in MicroAqua are available here: <http://bioaqua1.microaqua.eu/people>

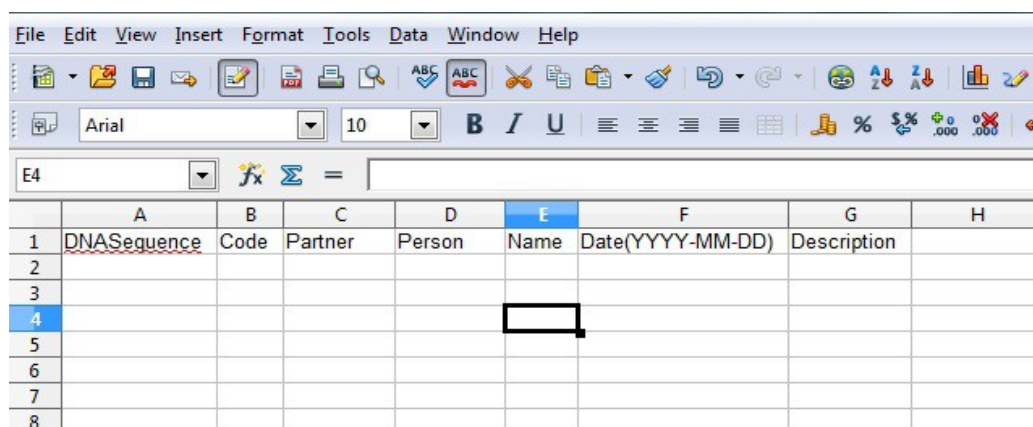

|   | A          | B    | C       | D      | E    | F                | G           | H |
|---|------------|------|---------|--------|------|------------------|-------------|---|
| 1 | DNASquence | Code | Partner | Person | Name | Date(YYYY-MM-DD) | Description |   |
| 2 |            |      |         |        |      |                  |             |   |
| 3 |            |      |         |        |      |                  |             |   |
| 4 |            |      |         |        |      |                  |             |   |
| 5 |            |      |         |        |      |                  |             |   |
| 6 |            |      |         |        |      |                  |             |   |
| 7 |            |      |         |        |      |                  |             |   |
| 8 |            |      |         |        |      |                  |             |   |

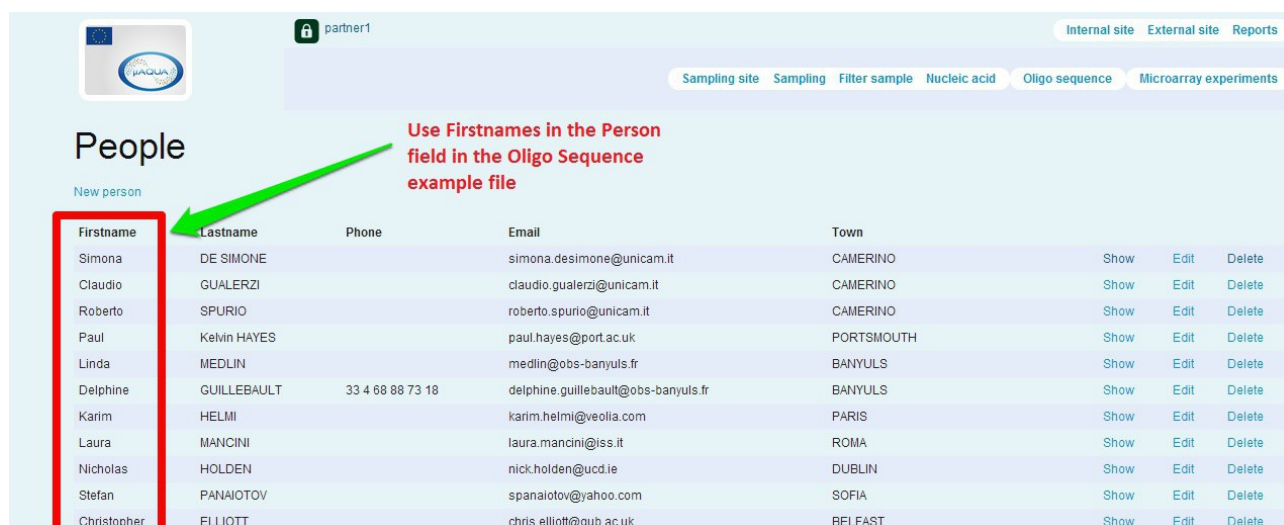

Internal site External site Reports

Sampling site Sampling Filter sample Nucleic acid Oligo sequence Microarray experiments

**People**

New person

Use Firstnames in the Person field in the Oligo Sequence example file

| Firstname   | Lastname     | Phone            | Email                               | Town       | Show | Edit | Delete |
|-------------|--------------|------------------|-------------------------------------|------------|------|------|--------|
| Simona      | DE SIMONE    |                  | simona.desimone@unicam.it           | CAMERINO   |      |      |        |
| Claudio     | GUALERZI     |                  | claudio.gualerzi@unicam.it          | CAMERINO   |      |      |        |
| Roberto     | SPURIO       |                  | roberto.spurio@unicam.it            | CAMERINO   |      |      |        |
| Paul        | Kelvin HAYES |                  | paul.hayes@port.ac.uk               | PORTSMOUTH |      |      |        |
| Linda       | MEDLIN       |                  | medlin@obs-banyuls.fr               | BANYULS    |      |      |        |
| Delphine    | GUILLEBAULT  | 33 4 68 88 73 18 | delphine.guillebault@obs-banyuls.fr | BANYULS    |      |      |        |
| Karim       | HELM         |                  | karim.helmi@veolia.com              | PARIS      |      |      |        |
| Laura       | MANCINI      |                  | laura.mancini@iss.it                | ROMA       |      |      |        |
| Nicholas    | HOLDEN       |                  | nick.holden@ucd.ie                  | DUBLIN     |      |      |        |
| Stefan      | PANAIOV      |                  | spanaiotov@yahoo.com                | SOFIA      |      |      |        |
| Christopher | ELLIOTT      |                  | chris.elliott@qub.ac.uk             | BELFAST    |      |      |        |
